# Supplementary material for: Remote-Controllable Bone-Targeted Delivery of Estradiol For the Treatment of Ovariectomy-Induced Osteoporosis in Rats
Source: Research Square preprint supplement (doi:10.21203/rs.3.rs-628262/v1), 2021-06-23
Supplement: Supplementary file 1 [file 32931146c5ab76f402e08949.docx]

**Graphical abstract**

Schematic illustration of the preparation of bone-targeted nanoparticles and remote-controlled release of 17β estradiol.

**
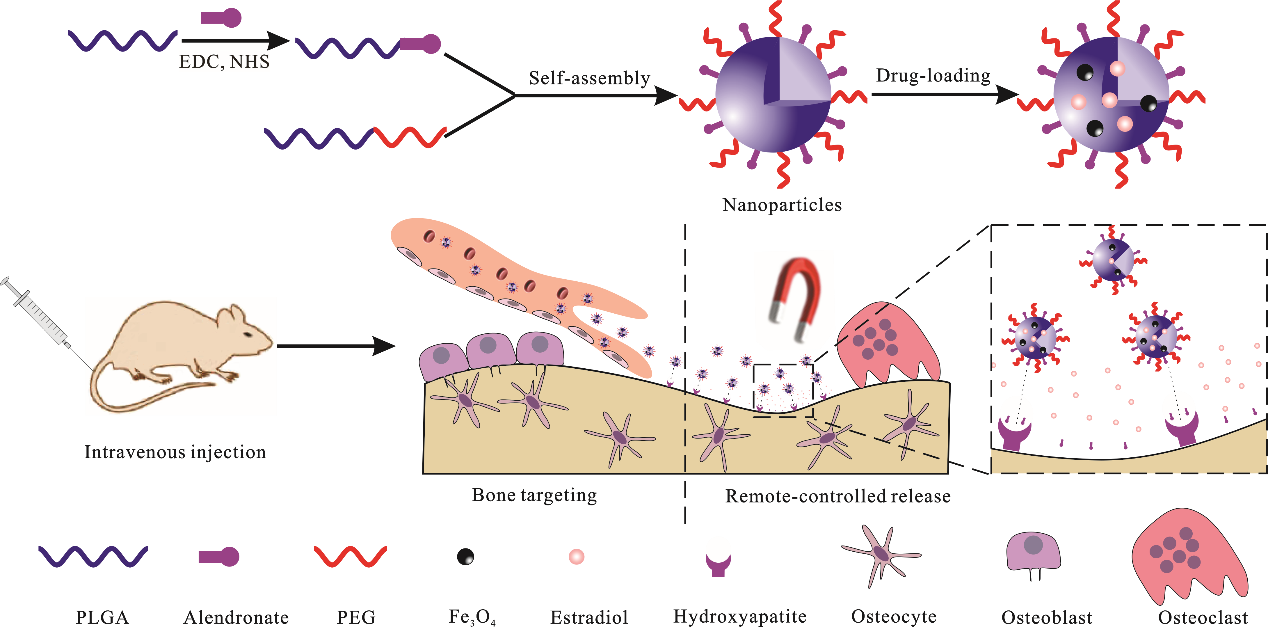
**
